# Supplementary material
Source: PubMed Central journal article supplement (PMC6331242)
Supplement: NIHMS1512235-supplement-1.pdf [file NIHMS1512235-supplement-1.pdf]

## Supplementary Figure S1

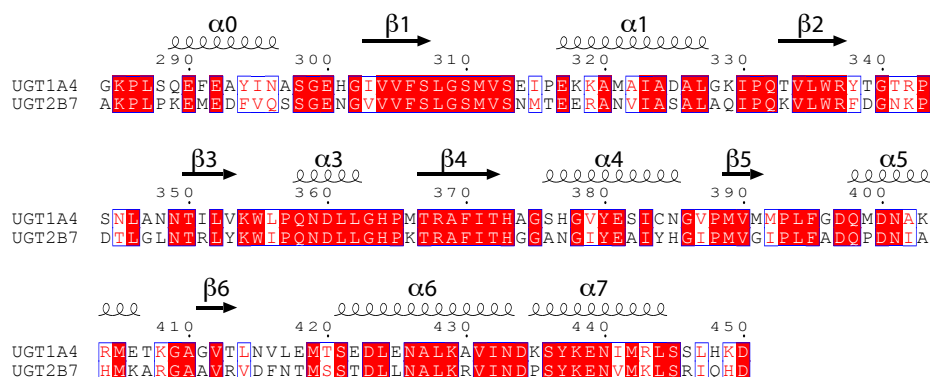

**Fig. S1.** Alignment of UGT1A4 and UGT2B7 C-domains. Secondary structural elements derived from the UGT2B7 X-ray structure are shown above the sequence (arrows indicate  $\beta$ -strands and loops,  $\alpha$ -helices) [23, 24]. The chemical shift index (CSI) for UGT1A-C and these elements were in good agreement [31] providing a strong basis for modelling UGT1A-C on the UGT2B7 structure. The alignment was done using Clustal W2 program (<http://www.ebi.ac.uk>). Conserved residues are in red and boxed with a white background, while identical residues are boxed on a red background.

## Supplementary Figure S2

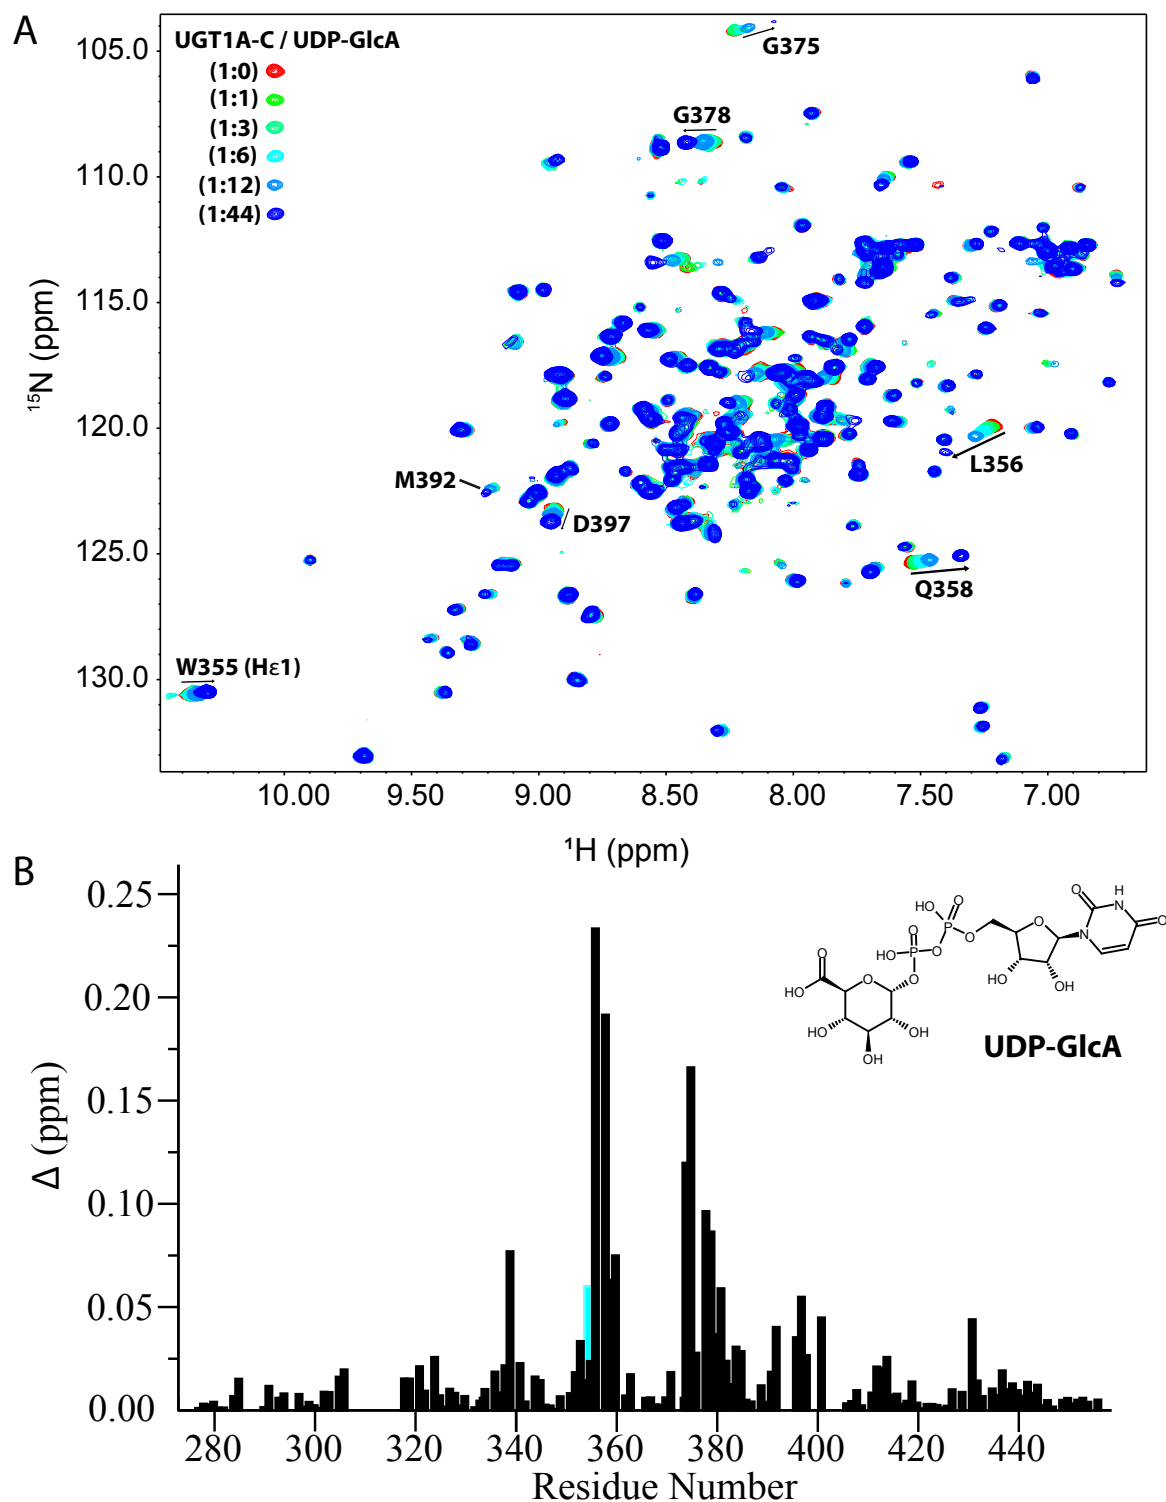

**Fig. S2.** UDP-GlcA-binding site on UGT1A-C from NMR studies. (A) Chemical shift perturbation (CSP) observed upon UDP-GlcA addition in the  $^1\text{H}$ - $^{15}\text{N}$  HSQC using  $^{15}\text{N}$ -labelled UGT1A-C. Residues located at the UDP-GlcA binding site are highlighted. (B) Quantitation of CSPs derived from  $^1\text{H}$ - $^{15}\text{N}$  HSQC experiments using  $^{15}\text{N}$ -labelled UGT1A-C in the presence of UDP-GlcA. The blue bar indicates the CSP for the indole nitrogen from W355. The chemical structure of UDP-GlcA is also shown

## Supplementary Figure S3

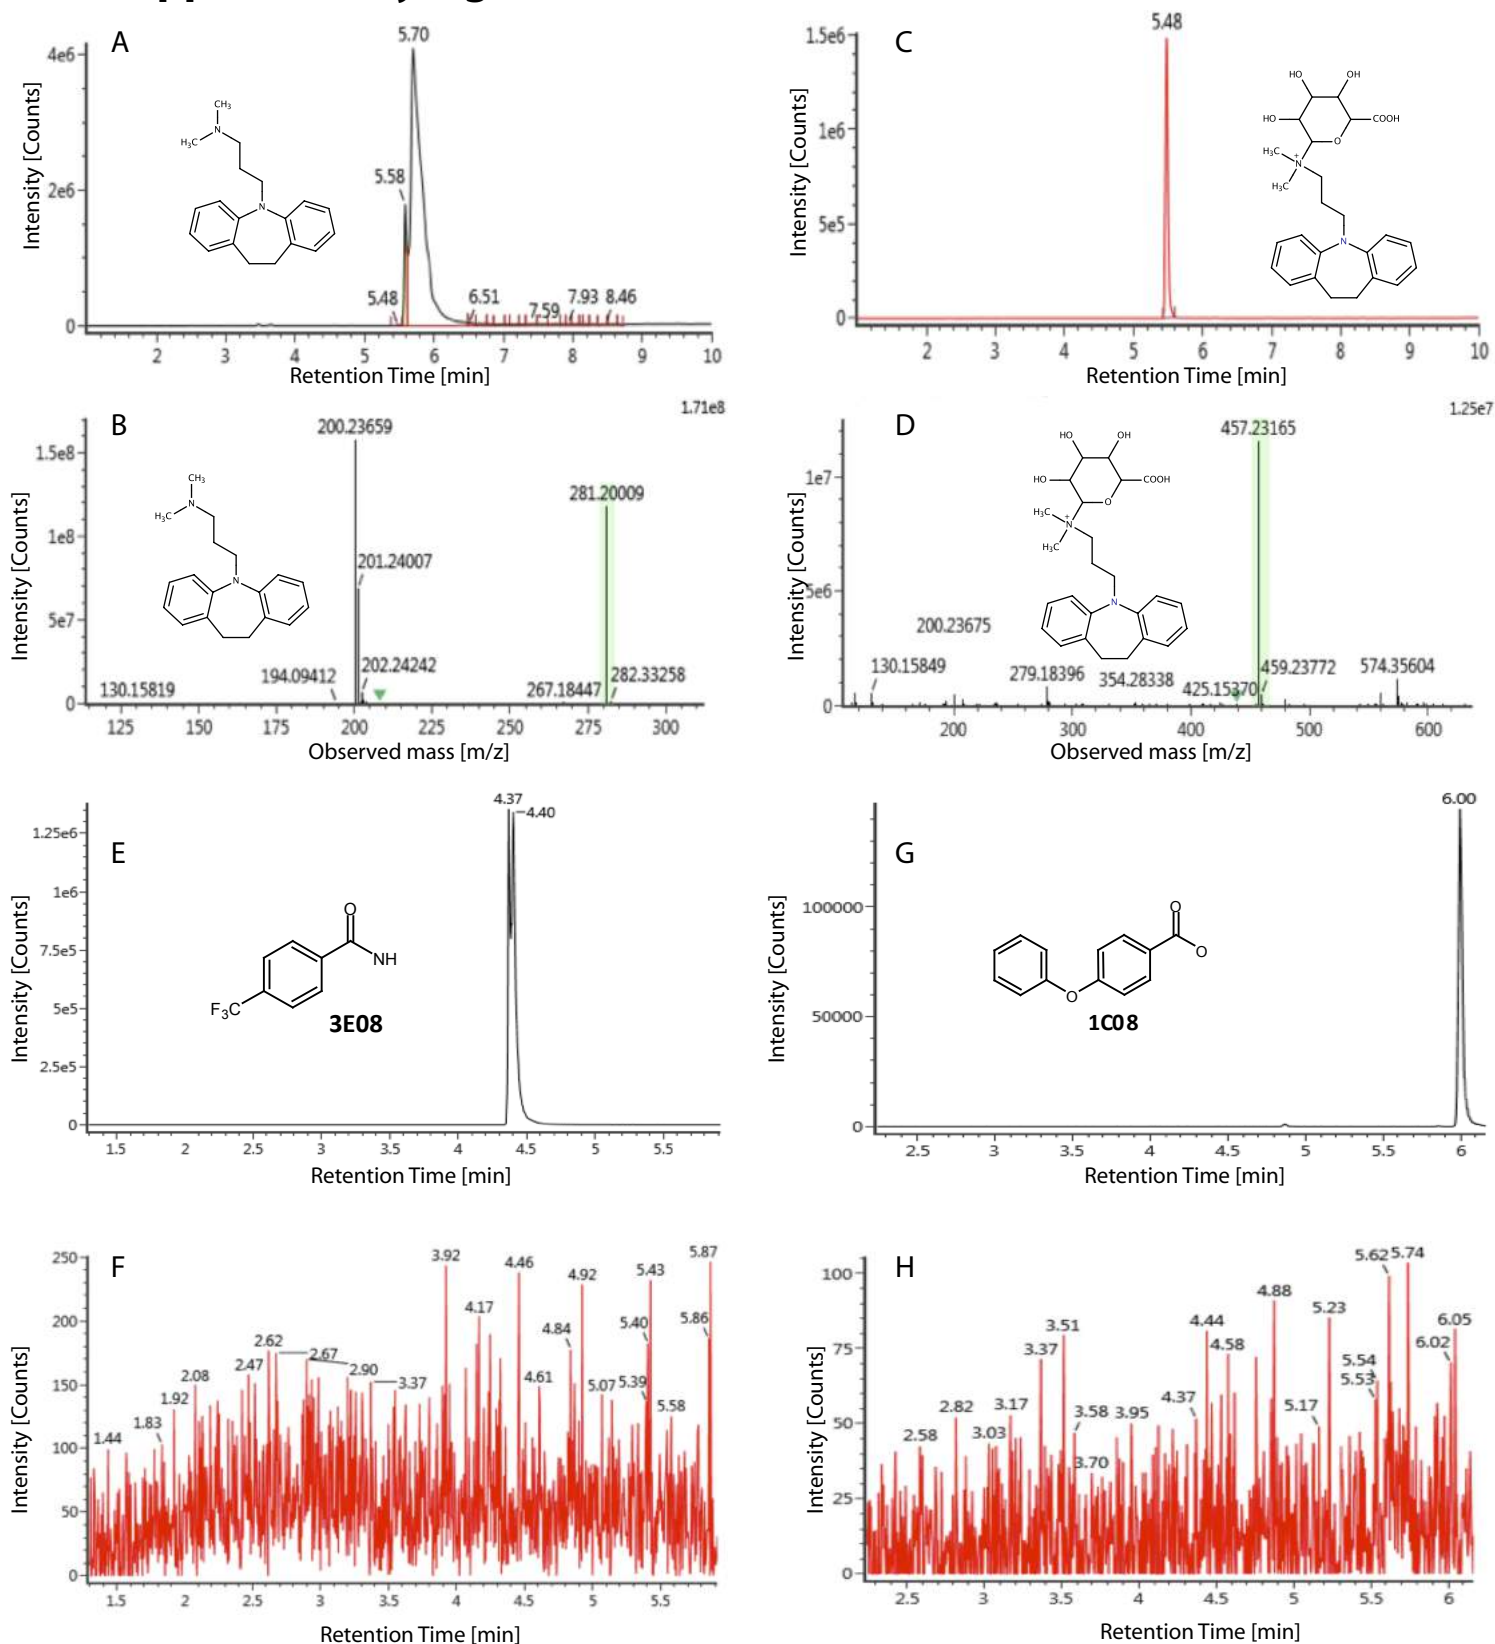

**Fig. S3.** Summary of mass spectrometry experiments searching for glucuronides of selected compounds after incubation with UGT1A4 or UGT1A1 microsomes. Top panel; UPLC extracted ion chromatogram (EIC) traces for (A) imipramine at the m/z of 281.2 for the parent compound and (C) for the glucuronide at the mass of the m/z of the parent ion +176.0321 Da. B) ESI mass spectra showing the parent compound and D) the glucuronide at m/z 457.231565 Da E) EIC for compound 3E08 at m/z 190.0479 (+/-5 ppm) for the parent compound and (F) its glucuronide at 366.08 Da (+/- 5ppm) after incubation in UGT1A4 microsomes. G) EIC for compound 1C08 at m/z of the parent compound (215.0708 Da) and H) for the glucuronide (391.1029 +/- 5 ppm) after incubation in UGT1A1 microsomes. No glucuronides were detected for 3E08 and 1C08.

## Supplementary Figure S4

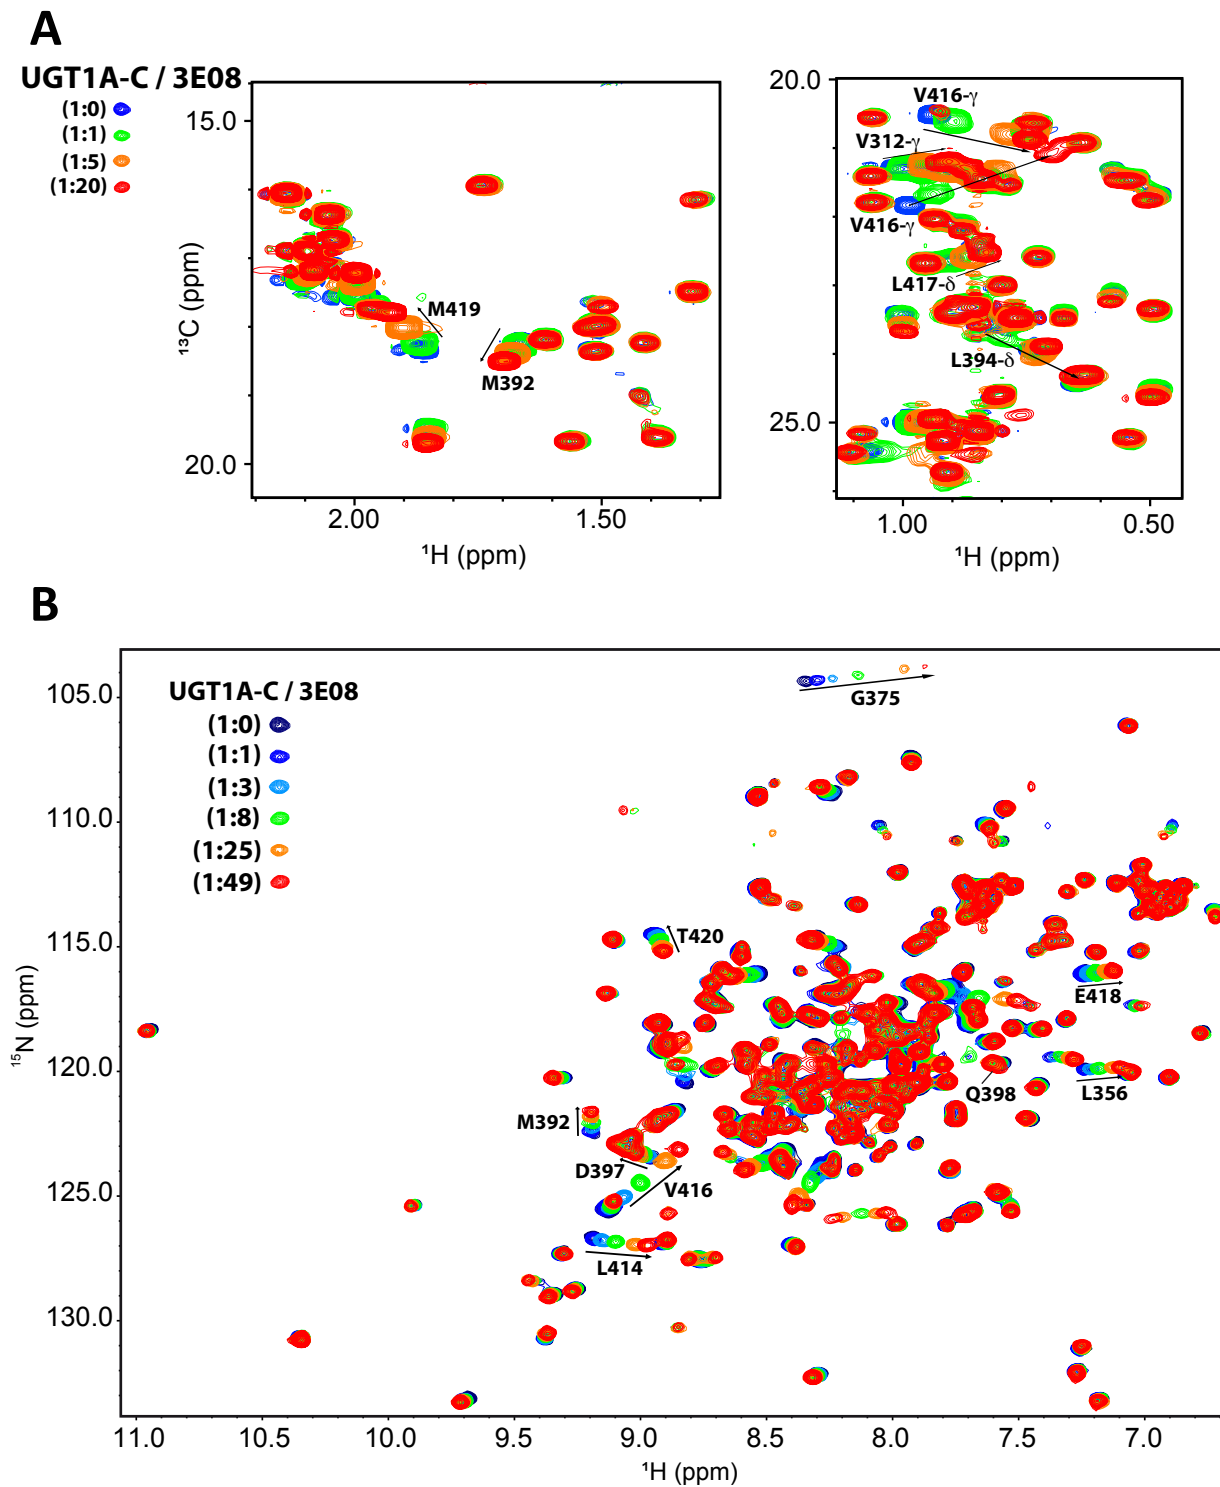

## Supplementary Figure S5

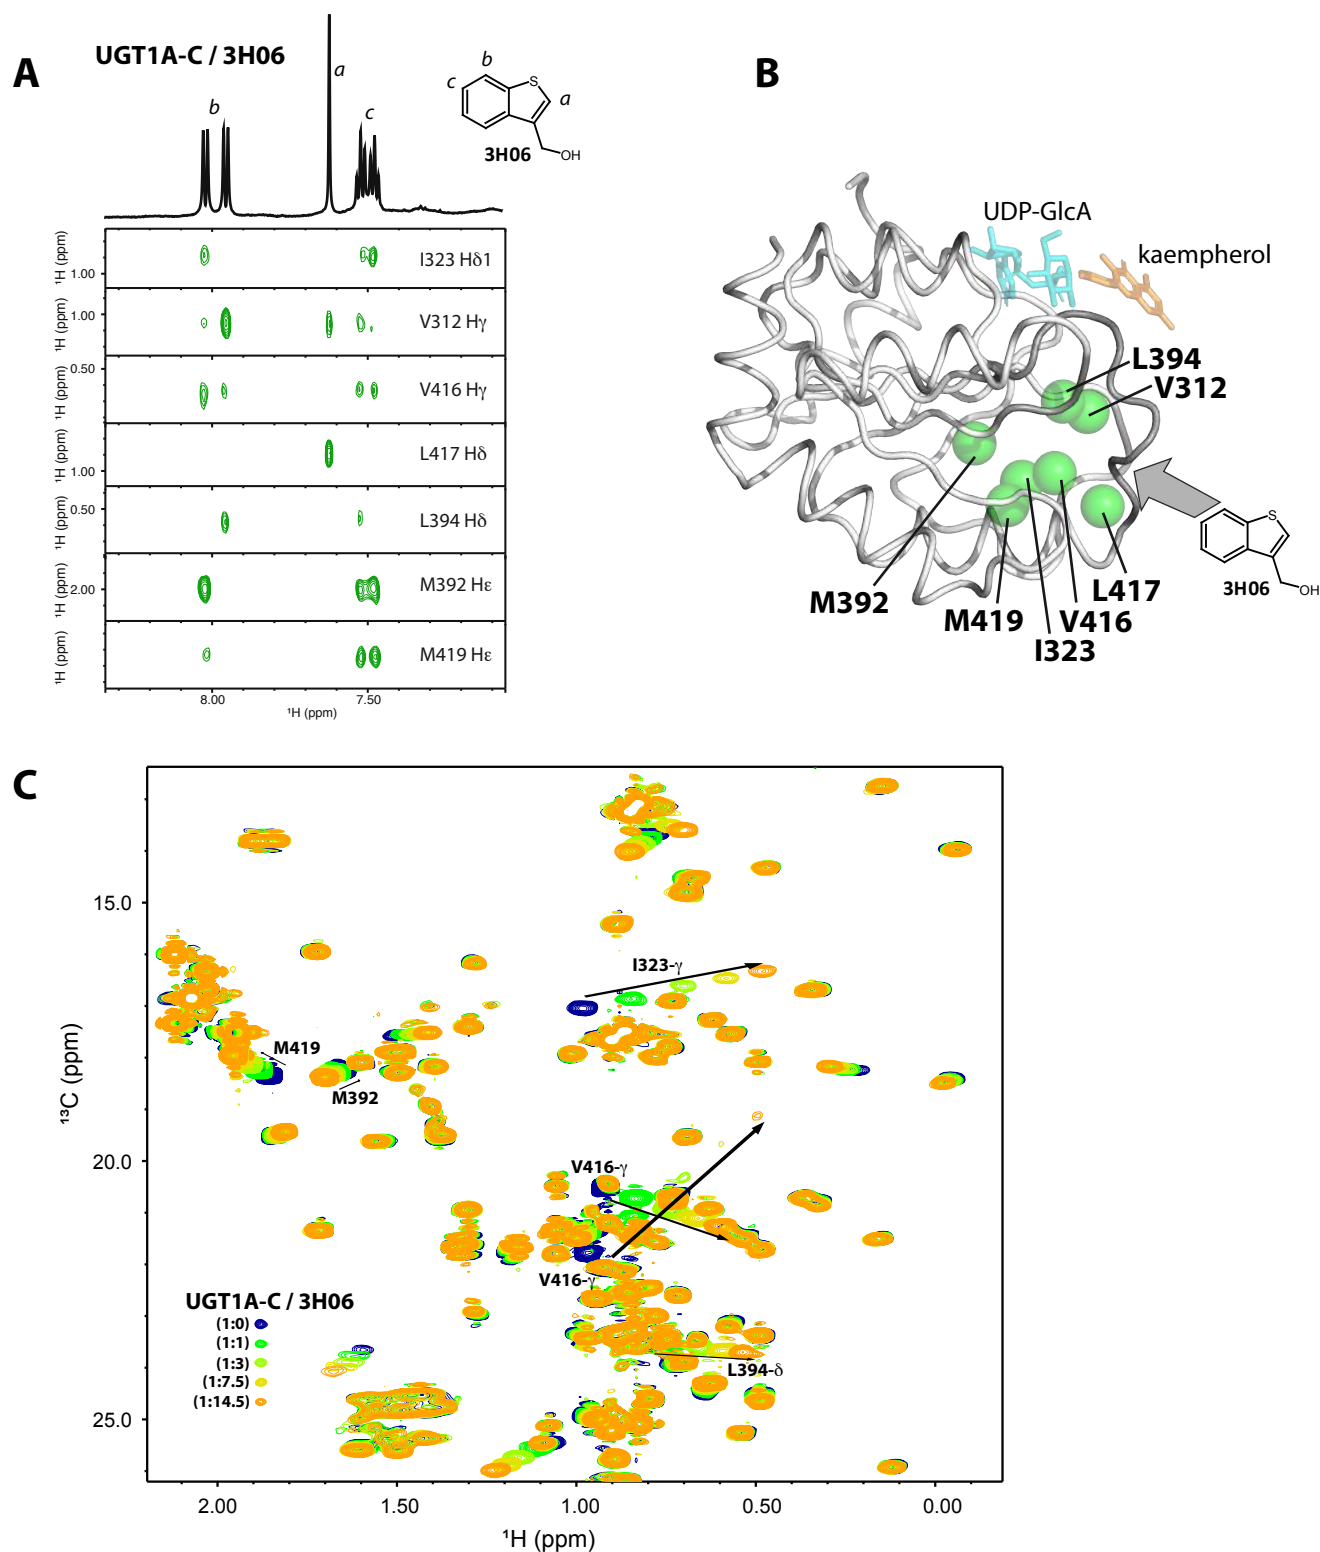

**Fig. S5.** NMR analysis of 3H06 binding to UGT1A-C. (A)  $^1\text{H}$ - $^1\text{H}$  strips from the  $^{13}\text{C}$ -edited,  $^{13}\text{C}/^{15}\text{N}$  filtered NOESY showing intermolecular NOEs between methyl resonances of  $^{13}\text{C}/^{15}\text{N}$  UGT1A-C and 3H06. 1D  $^1\text{H}$  NMR spectrum of 3H06 and its chemical structure are also shown. (B) NOEs are mapped onto the UGT1A-C model structure, as shown by green balls. The active site is marked by UDP-GlcA (cyan) and kaempferol (orange) to provide orientation, but these compounds were not present in the mapping experiments. (C)  $^1\text{H}$ - $^{13}\text{C}$  HSQC of UGT1A-C showing CSP upon addition of 3H06. Perturbed shifts agree well with the observed NOEs.

## Supplementary Figure S6

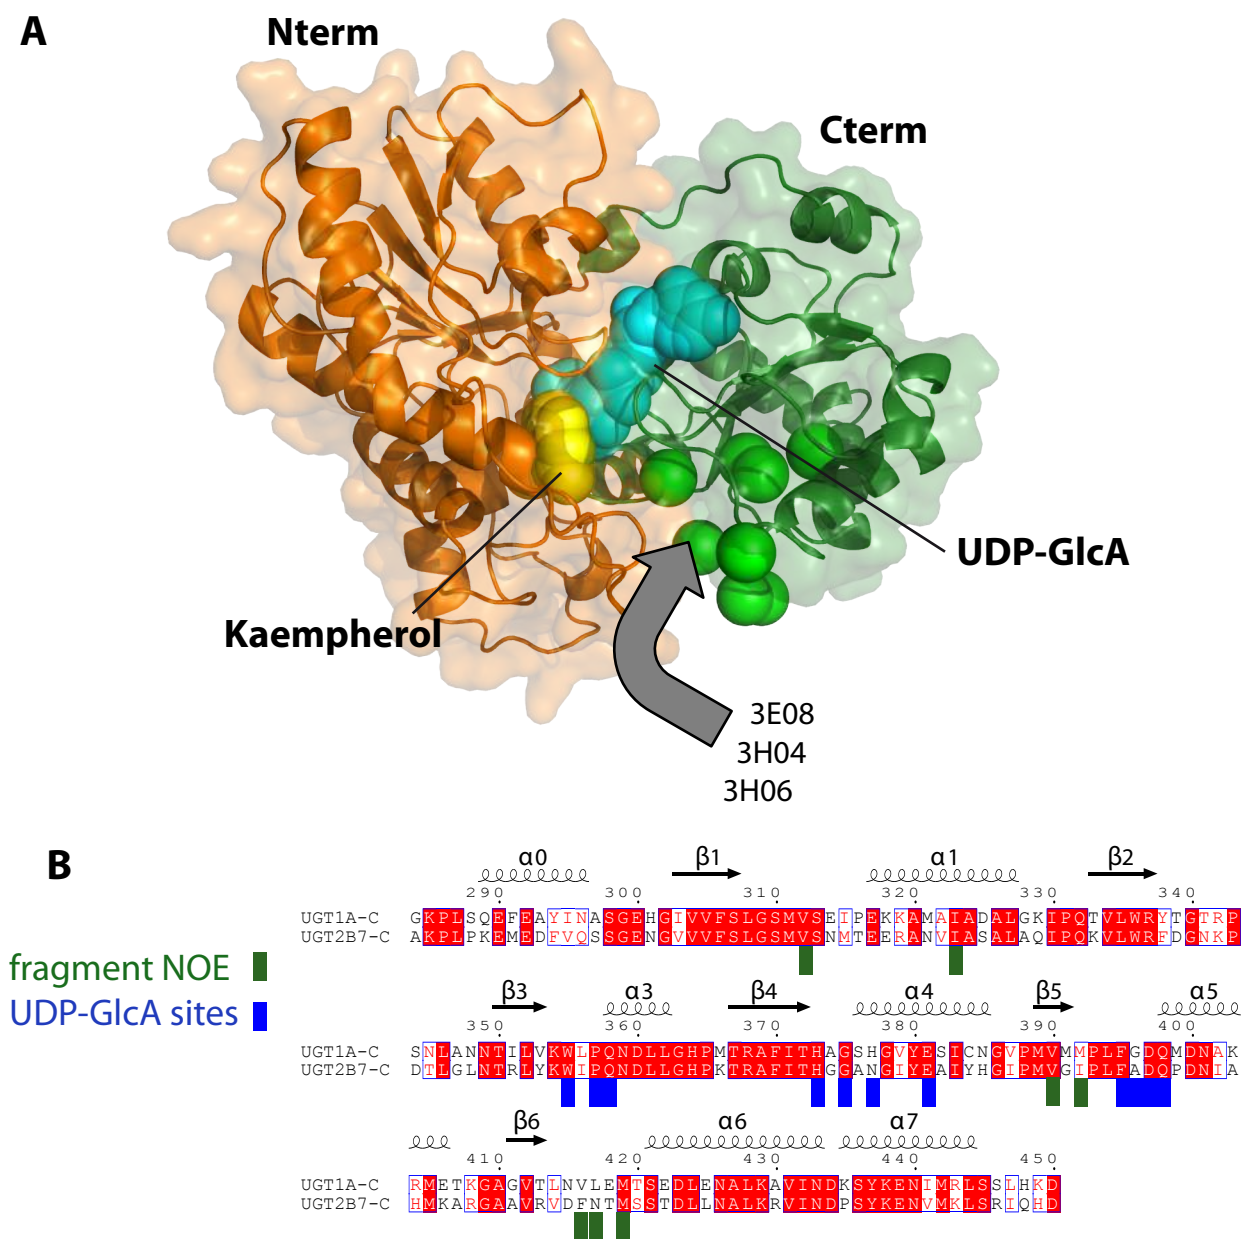

**Fig. S6.** (A) Model based on Fig. 1B which shows position of the fragment binding site as well as kaempferol and UDP-GlcA. Colouring is the same as in Fig 1B. Green balls represent methyl groups which make NOEs to E308 as a marker of the fragment binding site for 3E08, 3H04 and 3H06. This model shows that the fragments would make contacts with the N-domain and thus provide a basis for the observed allostery. (B) Summary of the NMR defined UDP-GlcA and fragment sites are represented on the sequence of UGT1A4, for comparison the UGT2B7 alignment is shown. Blue bars represent binding sites for UGP-GlcA from CSP and the UGT1A-C model. Green bars represent NOE's from the fragments (3E08 and 3H06) to UGT1A-C identified.
